# Supplementary material for: Bisdemethoxycurcumin Alleviates Dextran Sodium Sulfate-Induced Colitis via Inhibiting NLRP3 Inflammasome Activation and Modulating the Gut Microbiota in Mice
Source: MDPI journal article supplement (doi:10.3390/antiox11101994), 2022-10-07
Supplement: s1 [file s1]

# Bisdemethoxycurcumin Alleviates Dextran Sodium Sulfate-induced Colitis via Inhibiting NLRP3 Inflammasome Activation and Modulating the Gut Microbiota in Mice

Jingfei Zhang, Qiming Li, Xin Zhang, Yanan Chen, Yufang Lu, Xinyu Wang, Lili Zhang and Tian Wang

**Table S1.** The disease activity index scoring system.

| Score | Weight Loss | Stool Consistency | Blood Stools   |
|-------|-------------|-------------------|----------------|
| 0     | <1 %        | normal            | normal         |
| 1     | 1-5 %       | -                 | -              |
| 2     | 5-10 %      | loose stool       | slight         |
| 3     | 10-15 %     | -                 | -              |
| 4     | >15 %       | diarrhea          | gross bleeding |

**Table S2.** Sequences of primers used for RT-PCR.

| Genes          |         | Primer Sequence         | Accession      | Product (bp) |
|----------------|---------|-------------------------|----------------|--------------|
| NLRP3          | Forward | CTCGTCACCATGGGTTCTGGT   | NM_145827.4    | 230          |
|                | Reverse | AACGGACACTCGTCATCTTCA   |                |              |
| ASC            | Forward | TGAGCAGCTGCAAACGACTA    | NM_023258.4    | 200          |
|                | Reverse | CACGAACCTGCTGGTACTGT    |                |              |
| IL-1 $\beta$   | Forward | TGCCACCTTTTGACAGTGATG   | NM_008361.4    | 220          |
|                | Reverse | AAGGTCCACGGGAAAAGACAC   |                |              |
| IL-18          | Forward | CCTTTGAGGCATCCAGGACAA   | NM_008360.2    | 209          |
|                | Reverse | CGGGGCCTGAGGATTATAGC    |                |              |
| GSDMD          | Forward | GATCAAGGAGGTAAGCGGCA    | NM_026960.4    | 195          |
|                | Reverse | CACTCCGTTCTGTTTCTGG     |                |              |
| ZO-1           | Forward | CTCTCCTGTACCTCTTGAGCC   | NM_009386.2    | 263          |
|                | Reverse | CAGAAATCGTGTGCTGATGTGCC |                |              |
| Occludin       | Forward | CCGGCCGCCAAGGTTT        | NM_008756.2    | 78           |
|                | Reverse | GCTGATGTCACTGGTCACCTA   |                |              |
| Claudin-1      | Forward | TATGACCCCTTGACCCCAT     | NM_016674.4    | 132          |
|                | Reverse | AGAGGTTGTTTTCCGGGGAC    |                |              |
| Bax            | Forward | CACTAAAGTGCCCGAGCTGA    | NM_007527.3    | 84           |
|                | Reverse | TCTTGGATCCAGACAAGCAGC   |                |              |
| Bcl2           | Forward | GAAGTGGGGGAGGATTGTGG    | NM_009741.5    | 194          |
|                | Reverse | GCATGCTGGGGCCATATAGT    |                |              |
| Caspase 1      | Forward | TGGGACCCTCAAGTTTGGC     | XM_040690807.2 | 490          |
|                | Reverse | GCTCCAACCCTCGGAGAAAG    |                |              |
| Caspase 3      | Forward | GAGCTTGGAAACGGTACGCTA   | NM_001284409.1 | 234          |
|                | Reverse | CCGTACCAGAGCGAGATGAC    |                |              |
| Caspase 7      | Forward | GCCTCTGGGACTTTTGCTTTC   | NM_007611.2    | 189          |
|                | Reverse | ATAGAGGAGCGGTCTGGCTT    |                |              |
| Caspase 9      | Forward | AAAGTGGCTCCTGGTACATCG   | NM_015733.5    | 113          |
|                | Reverse | CCCTTTCGCAGAAACAGCAT    |                |              |
| $\beta$ -actin | Forward | TGTACCCAGGCATTGCTGAC    | NM_007393.5    | 238          |
|                | Reverse | AACGCAGCTCAGTAACAGTCC   |                |              |
| GAPDH          | Forward | TCTCCTGCGACTTCAACA      | NM_001289726.1 | 117          |
|                | Reverse | TGTAGCCGTATTGCTGCA      |                |              |

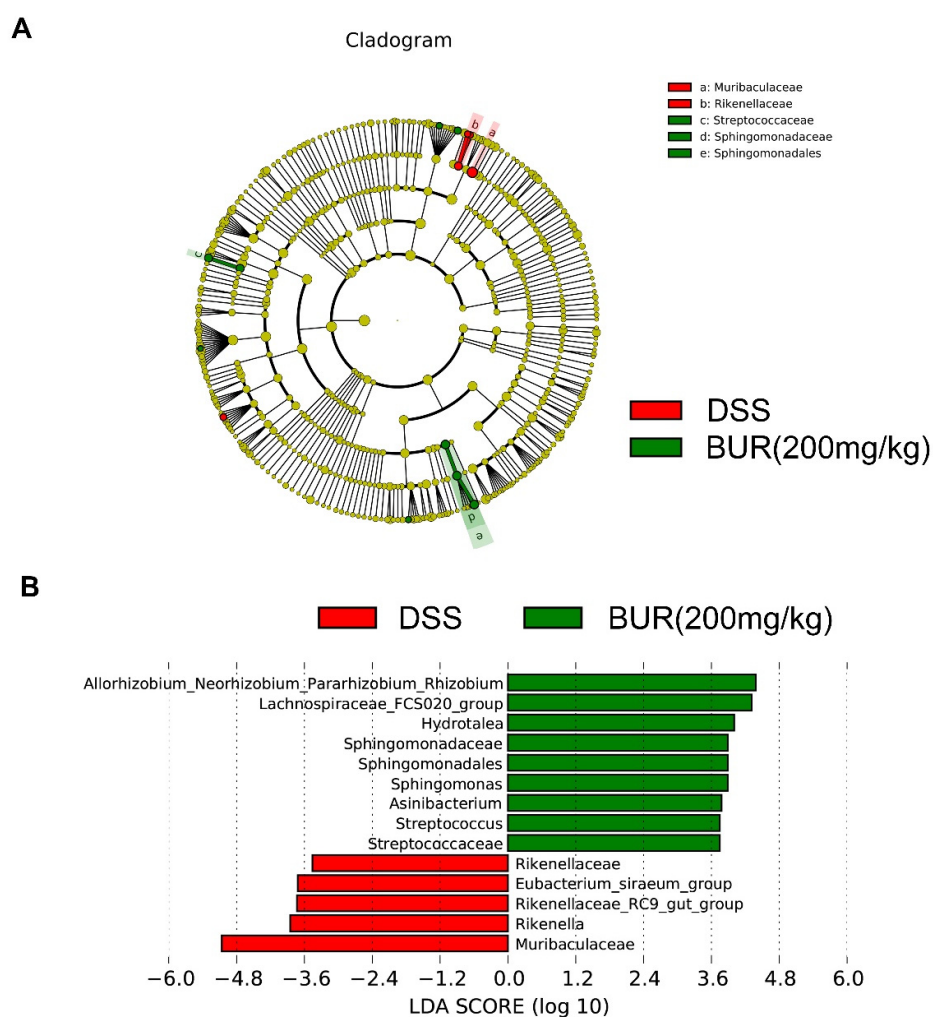

**Figure S1.** LEfSe analysis of the gut microbial composition among treatment groups (LDA > 2,  $P < 0.05$ ). (A) Cladogram representation of the microbiota taxa between the DSS group and BUR (200 mg/kg) group. (B) LDA of the microbiota taxa between the DSS group and BUR (200 mg/kg) group.
